# Supplementary material for: XAB2 functions in mitotic cell cycle progression via transcriptional regulation of CENPE
Source: PubMed Central journal article supplement (PMC5133980; doi:10.1038/cddis.2016.313), 2016-10-13

Fig. S1

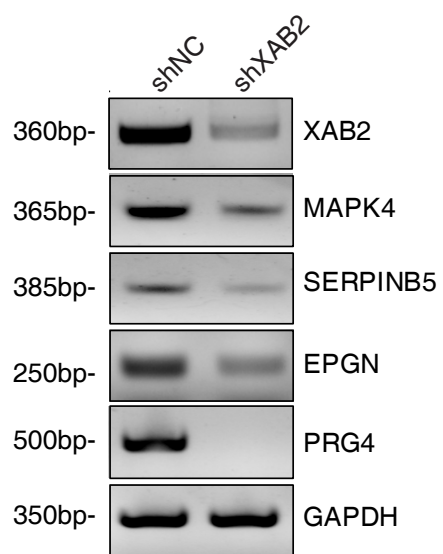

Supplement: cddis2016313x1.pdf [file cddis2016313x1.pdf]
