# Supplementary material for: XAB2 functions in mitotic cell cycle progression via transcriptional regulation of CENPE
Source: PubMed Central journal article supplement (PMC5133980; doi:10.1038/cddis.2016.313), 2016-10-13
Supplement: cddis2016313x4.pdf [file cddis2016313x4.pdf]

**Table S1 Differential expression of genes (>2-fold, p<0.05) after XAB2 knockdown**

| <b>Gene Symbol</b>                                                                          | <b>Fold Change</b> | <b>Description</b>                                                                                                                                                                                                                                                                                                                                                          |
|---------------------------------------------------------------------------------------------|--------------------|-----------------------------------------------------------------------------------------------------------------------------------------------------------------------------------------------------------------------------------------------------------------------------------------------------------------------------------------------------------------------------|
| MIR4521                                                                                     | 8.16               | microRNA 4521                                                                                                                                                                                                                                                                                                                                                               |
| SNORD19                                                                                     | 6.11               | small nucleolar RNA, C/D box 19                                                                                                                                                                                                                                                                                                                                             |
| CCL2                                                                                        | 6.05               | chemokine (C-C motif) ligand 2; NULL                                                                                                                                                                                                                                                                                                                                        |
| SNX12                                                                                       | 5.5                | sorting nexin 12; NULL                                                                                                                                                                                                                                                                                                                                                      |
| SGK196;<br>OTTHUMG00000164100                                                               | 4.88               | protein kinase-like protein SgK196; NULL                                                                                                                                                                                                                                                                                                                                    |
| SNORD27; SNORD29;<br>SNORD26; SNORD30;<br>SNORD28; SNORD22;<br>SNORD31; SNORD25; SNHG1      | 4.69               | small nucleolar RNA, C/D box 27; small nucleolar RNA, C/D box 29; small nucleolar RNA, C/D box 26; small nucleolar RNA, C/D box 30; small nucleolar RNA, C/D box 28; small nucleolar RNA, C/D box 22; small nucleolar RNA, C/D box 31; small nucleolar RNA, C/D box 25; small nucleolar RNA host gene 1 (non-protein coding)                                                |
| RPL30                                                                                       | 4.57               | NULL                                                                                                                                                                                                                                                                                                                                                                        |
| PDRG1                                                                                       | 4.24               | p53 and DNA-damage regulated 1; NULL                                                                                                                                                                                                                                                                                                                                        |
| TMEM109                                                                                     | 4.05               | transmembrane protein 109                                                                                                                                                                                                                                                                                                                                                   |
| HNRNPU-AS1                                                                                  | 3.86               | HNRNPU antisense RNA 1; NULL                                                                                                                                                                                                                                                                                                                                                |
| RPIA; LOC101060545                                                                          | 3.81               | ribose 5-phosphate isomerase A; ribose-5-phosphate isomerase-like; NULL                                                                                                                                                                                                                                                                                                     |
| SFT2D2                                                                                      | 3.78               | SFT2 domain containing 2; NULL                                                                                                                                                                                                                                                                                                                                              |
| SNORA32; SNORA1;<br>SNORA18; SNORA8; MIR1304;<br>SNORD5; TAF1D; SNORA40;<br>SNORA25; SNORD6 | 3.75               | small nucleolar RNA, H/ACA box 32; small nucleolar RNA, H/ACA box 1; small nucleolar RNA, H/ACA box 18; small nucleolar RNA, H/ACA box 8; microRNA 1304; small nucleolar RNA, C/D box 5; TATA box binding protein (TBP)-associated factor, RNA polymerase I, D, 41kDa; small nucleolar RNA, H/ACA box 40; small nucleolar RNA, H/ACA box 25; small nucleolar RNA, C/D box 6 |
| MIR21                                                                                       | 3.62               | microRNA 21                                                                                                                                                                                                                                                                                                                                                                 |
| HAUS2                                                                                       | 3.6                | HAUS augmin-like complex, subunit 2; NULL                                                                                                                                                                                                                                                                                                                                   |
| NCBP2                                                                                       | 3.56               | nuclear cap binding protein subunit 2, 20kDa; NULL                                                                                                                                                                                                                                                                                                                          |
| TMEM30A                                                                                     | 3.53               | transmembrane protein 30A; NULL                                                                                                                                                                                                                                                                                                                                             |
| AASDHPPT                                                                                    | 3.53               | aminoadipate-semialdehyde dehydrogenase-phosphopantetheinyl transferase                                                                                                                                                                                                                                                                                                     |
| CDC42SE2                                                                                    | 3.49               | CDC42 small effector 2; NULL                                                                                                                                                                                                                                                                                                                                                |
| ANKRD40                                                                                     | 3.48               | ankyrin repeat domain 40; NULL                                                                                                                                                                                                                                                                                                                                              |
| SNORA5A                                                                                     | 3.26               | small nucleolar RNA, H/ACA box 5A                                                                                                                                                                                                                                                                                                                                           |

|                                                 |                                                                                                              |
|-------------------------------------------------|--------------------------------------------------------------------------------------------------------------|
| ERH                                             | 3.25 enhancer of rudimentary homolog (Drosophila)                                                            |
| RNU12                                           | 3.23 RNA, U12 small nuclear                                                                                  |
| ABHD17C                                         | 3.17 abhydrolase domain containing 17C                                                                       |
| SNORD75                                         | 3.15 small nucleolar RNA, C/D box 75                                                                         |
| SNHG17;<br>OTTHUMG00000032442; RP4-<br>564F22.2 | 3.12 small nucleolar RNA host gene 17 (non-protein<br>coding); NULL                                          |
| SNORA14B                                        | 3.11 small nucleolar RNA, H/ACA box 14B                                                                      |
| ZNF830                                          | 3.11 zinc finger protein 830<br>tumor necrosis factor receptor superfamily,                                  |
| TNFRSF10D                                       | 3.08 member 10d, decoy with truncated death<br>domain; NULL<br>pleckstrin homology domain containing, family |
| PLEKHA3                                         | 3.05 A (phosphoinositide binding specific) member<br>3; NULL                                                 |
| SNORD69                                         | 3.01 small nucleolar RNA, C/D box 69                                                                         |
| ODC1                                            | 3 ornithine decarboxylase 1; NULL                                                                            |
| NR1D1                                           | 2.98 nuclear receptor subfamily 1, group D, member<br>1; NULL                                                |
| STARD7                                          | 2.97 StAR-related lipid transfer (START) domain<br>containing 7; NULL                                        |
| ANP32B                                          | 2.97 acidic (leucine-rich) nuclear phosphoprotein 32<br>family, member B; NULL                               |
| VMA21                                           | 2.95 VMA21 vacuolar H <sup>+</sup> -ATPase homolog (S.<br>cerevisiae); NULL                                  |
| HIPK3                                           | 2.94 homeodomain interacting protein kinase 3;                                                               |
| LUZP6; MTPN                                     | 2.92 leucine zipper protein 6; myotrophin; NULL                                                              |
| YRDC                                            | 2.89 yrdC domain containing (E. coli); NULL                                                                  |
| DESI2                                           | 2.88 desumoylating isopeptidase 2; NULL                                                                      |
| SSX2B; SSX2                                     | 2.87 synovial sarcoma, X breakpoint 2B; synovial<br>sarcoma, X breakpoint 2; NULL                            |
| SSX2B; SSX2                                     | 2.86 synovial sarcoma, X breakpoint 2B; synovial<br>sarcoma, X breakpoint 2; NULL                            |
| SMN1; SMN2                                      | 2.85 survival of motor neuron 1, telomeric; survival<br>of motor neuron 2, centromeric; NULL                 |
| RAB14                                           | 2.85 RAB14, member RAS oncogene family; NULL                                                                 |
| SCARNA8                                         | 2.84 small Cajal body-specific RNA 8                                                                         |
| CRKL                                            | 2.84 v-crk sarcoma virus CT10 oncogene homolog<br>(avian)-like; NULL                                         |
| NUS1                                            | 2.81 nuclear undecaprenyl pyrophosphate synthase 1<br>homolog (S. cerevisiae); NULL                          |
| C8orf33                                         | 2.81 chromosome 8 open reading frame 33                                                                      |

|                                             |      |                                                                                      |
|---------------------------------------------|------|--------------------------------------------------------------------------------------|
| TAF4B                                       | 2.81 | TAF4b RNA polymerase II, TATA box binding protein (TBP)-associated factor, 105kDa    |
| SNORA13                                     | 2.8  | small nucleolar RNA, H/ACA box 13                                                    |
| MIS12                                       | 2.79 | MIS12, MIND kinetochore complex component, homolog (S. pombe); NULL                  |
| SDC4                                        | 2.79 | syndecan 4; NULL                                                                     |
| SPG21                                       | 2.78 | spastic paraplegia 21 (autosomal recessive, Mast syndrome); NULL                     |
| SNORA65                                     | 2.77 | small nucleolar RNA, H/ACA box 65                                                    |
| PTBP2                                       | 2.74 | polypyrimidine tract binding protein 2; NULL                                         |
| FNIP1;<br>OTTHUMG00000162684;<br>AC005593.1 | 2.74 | folliculin interacting protein 1; NULL                                               |
| SNORA9; SNHG15                              | 2.73 | small nucleolar RNA, H/ACA box 9; small nucleolar RNA host gene 15 (non-protein      |
| TXNIP; LOC101060503                         | 2.7  | thioredoxin interacting protein; thioredoxin-interacting protein-like; NULL          |
| CDC123                                      | 2.7  | cell division cycle 123; NULL                                                        |
| PRPF39                                      | 2.7  | PRP39 pre-mRNA processing factor 39 homolog (S. cerevisiae); NULL                    |
| RNA5SP108                                   | 2.68 | RNA, 5S ribosomal pseudogene 108                                                     |
| NR1D2                                       | 2.68 | nuclear receptor subfamily 1, group D, member 2; NULL                                |
| SMN1; SMN2                                  | 2.68 | survival of motor neuron 1, telomeric; survival of motor neuron 2, centromeric; NULL |
| BRD2                                        | 2.68 | NULL                                                                                 |
| TUSC2                                       | 2.67 | tumor suppressor candidate 2; NULL                                                   |
| SNORA45                                     | 2.66 | small nucleolar RNA, H/ACA box 45                                                    |
| SEC61B                                      | 2.65 | Sec61 beta subunit; NULL                                                             |
| SNORD62B; SNORD62A                          | 2.64 | small nucleolar RNA, C/D box 62B; small nucleolar RNA, C/D box 62A                   |
| SNORD62B; SNORD62A                          | 2.64 | small nucleolar RNA, C/D box 62B; small nucleolar RNA, C/D box 62A                   |
| USP46                                       | 2.61 | ubiquitin specific peptidase 46; NULL                                                |
| GAN                                         | 2.61 | gigaxonin; NULL                                                                      |
| RNU5D-1                                     | 2.59 | RNA, U5D small nuclear 1                                                             |
| UBE2G1                                      | 2.57 | ubiquitin-conjugating enzyme E2G 1                                                   |
| GABPB1                                      | 2.56 | GA binding protein transcription factor, beta subunit 1; NULL                        |
| SNORD51                                     | 2.55 | small nucleolar RNA, C/D box 51                                                      |
| MIR3676                                     | 2.55 | microRNA 3676                                                                        |
| FYTTD1                                      | 2.53 | forty-two-three domain containing 1; NULL                                            |
| CBX1P1                                      | 2.53 | chromobox homolog 1 pseudogene 1                                                     |

|                              |                                                                                                                                |
|------------------------------|--------------------------------------------------------------------------------------------------------------------------------|
| SNORD4B                      | 2.53 small nucleolar RNA, C/D box 4B                                                                                           |
| OVGP1                        | 2.51 oviductal glycoprotein 1, 120kDa; NULL                                                                                    |
| API5                         | 2.51 apoptosis inhibitor 5                                                                                                     |
| CDCA5                        | 2.51 cell division cycle associated 5                                                                                          |
| SNORA55                      | 2.5 small nucleolar RNA, H/ACA box 55                                                                                          |
| YY1                          | 2.47 YY1 transcription factor; NULL                                                                                            |
| SNORA5C                      | 2.46 small nucleolar RNA, H/ACA box 5C                                                                                         |
| SNORD92                      | 2.45 small nucleolar RNA, C/D box 92                                                                                           |
| MAD2L1                       | 2.45 MAD2 mitotic arrest deficient-like 1 (yeast); NULL                                                                        |
| TSPAN6                       | 2.45 tetraspanin 6; NULL                                                                                                       |
| BTBD10                       | 2.45 BTB (POZ) domain containing 10                                                                                            |
| PMAIP1                       | 2.45 phorbol-12-myristate-13-acetate-induced protein 1; NULL                                                                   |
| SDE2                         | 2.44 SDE2 telomere maintenance homolog (S. pombe); NULL                                                                        |
| SNORD50A; SNHG5;<br>SNORD50B | 2.44 small nucleolar RNA, C/D box 50A; small nucleolar RNA host gene 5 (non-protein coding); small nucleolar RNA, C/D box 50B; |
| SNORD12C                     | 2.44 small nucleolar RNA, C/D box 12C                                                                                          |
| SNORD85                      | 2.43 small nucleolar RNA, C/D box 85                                                                                           |
| FOXJ3                        | 2.42 forkhead box J3; NULL                                                                                                     |
| SNORA53                      | 2.4 small nucleolar RNA, H/ACA box 53                                                                                          |
| NHP2L1                       | 2.4 NHP2 non-histone chromosome protein 2-like 1 (S. cerevisiae); NULL                                                         |
| SNORA10                      | 2.39 small nucleolar RNA, H/ACA box 10                                                                                         |
| RNU6-30P                     | 2.38 RNA, U6 small nuclear 30, pseudogene                                                                                      |
| NR2F2; MIR1469               | 2.38 nuclear receptor subfamily 2, group F, member 2; microRNA 1469; NULL                                                      |
| CBX1                         | 2.38 chromobox homolog 1; NULL                                                                                                 |
| TWISTNB                      | 2.37 TWIST neighbor; NULL                                                                                                      |
| RAD51AP1                     | 2.37 RAD51 associated protein 1                                                                                                |
| CDKN2AIP                     | 2.36 CDKN2A interacting protein; NULL                                                                                          |
| POLDIP3                      | 2.36 polymerase (DNA-directed), delta interacting protein 3; NULL                                                              |
| RNU6-23P                     | 2.34 RNA, U6 small nuclear 23, pseudogene                                                                                      |
| WDR45B; WDR45L               | 2.34 WD repeat domain 45B; WDR45-like; NULL                                                                                    |
| FBXO5                        | 2.33 F-box protein 5; NULL                                                                                                     |
| SNORD18B                     | 2.33 small nucleolar RNA, C/D box 18B                                                                                          |
| HIVEP2                       | 2.32 human immunodeficiency virus type I enhancer binding protein 2; NULL                                                      |
| OTUD3                        | 2.31 OTU domain containing 3; NULL                                                                                             |

|                                       |                                                                                                              |
|---------------------------------------|--------------------------------------------------------------------------------------------------------------|
| RMND5A                                | 2.31 required for meiotic nuclear division 5 homolog A ( <i>S. cerevisiae</i> ); NULL                        |
| RNF219                                | 2.3 ring finger protein 219; NULL                                                                            |
| SNORA38                               | 2.3 small nucleolar RNA, H/ACA box 38                                                                        |
| SNORA38                               | 2.3 small nucleolar RNA, H/ACA box 38                                                                        |
| SUB1                                  | 2.29 SUB1 homolog ( <i>S. cerevisiae</i> ); NULL                                                             |
| TMED9                                 | 2.29 transmembrane emp24 protein transport domain containing 9; NULL                                         |
| SMNDC1                                | 2.27 survival motor neuron domain containing 1;                                                              |
| USPL1                                 | 2.27 ubiquitin specific peptidase like 1; NULL                                                               |
| FAM103A1                              | 2.27 family with sequence similarity 103, member A1; NULL                                                    |
| CKS1B                                 | 2.26 CDC28 protein kinase regulatory subunit 1B; NULL                                                        |
| ARL5A                                 | 2.26 ADP-ribosylation factor-like 5A; NULL                                                                   |
| ACTL8                                 | 2.25 actin-like 8; NULL                                                                                      |
| SNORD101; SNORD100;<br>SNORA33        | 2.25 small nucleolar RNA, C/D box 101; small nucleolar RNA, C/D box 100; small nucleolar RNA, H/ACA box 33   |
| RCL1;<br>OTTHUMG00000019476;          | 2.25 RNA terminal phosphate cyclase-like 1; NULL                                                             |
| WDR82                                 | 2.24 WD repeat domain 82; NULL                                                                               |
| CREBZF                                | 2.24 CREB/ATF bZIP transcription factor; NULL                                                                |
| RNU6-27                               | 2.24 RNA, U6 small nuclear 27                                                                                |
| MTFR2; FAM54A                         | 2.23 mitochondrial fission regulator 2; NULL                                                                 |
| SNORD11B                              | 2.22 small nucleolar RNA, C/D box 11B                                                                        |
| SNORA74A                              | 2.22 small nucleolar RNA, H/ACA box 74A                                                                      |
| SNORA28                               | 2.22 small nucleolar RNA, H/ACA box 28<br>COP9 signalosome subunit 7B; COP9                                  |
| COPS7B                                | 2.21 constitutive photomorphogenic homolog subunit 7B ( <i>Arabidopsis</i> ); NULL                           |
| RNU6-80                               | 2.21 RNA, U6 small nuclear 80<br>small nucleolar RNA, H/ACA box 61; small nucleolar RNA, H/ACA box 44; small |
| SNORA61; SNORA44;<br>SNORA16A; SNHG12 | 2.2 nucleolar RNA, H/ACA box 16A; small nucleolar RNA host gene 12 (non-protein coding); NULL                |
| RNU6-45P                              | 2.2 RNA, U6 small nuclear 45, pseudogene                                                                     |
| PEBP1                                 | 2.2 phosphatidylethanolamine binding protein 1                                                               |
| PRPF3                                 | 2.19 pre-mRNA processing factor 3; NULL                                                                      |
| RNU6-31P                              | 2.19 RNA, U6 small nuclear 31, pseudogene                                                                    |
| SNORA75                               | 2.19 small nucleolar RNA, H/ACA box 75                                                                       |
| SCML2                                 | 2.19 sex comb on midleg-like 2 ( <i>Drosophila</i> ); NULL                                                   |

|                  |                                                                                         |
|------------------|-----------------------------------------------------------------------------------------|
| MAPRE1           | 2.19 microtubule-associated protein, RP/EB family, member 1; NULL                       |
| TMEM185B         | 2.18 transmembrane protein 185B                                                         |
| SMAD5            | 2.18 SMAD family member 5; NULL                                                         |
| RNU12-2P         | 2.18 RNA, U12 small nuclear 2, pseudogene                                               |
| ALYREF           | 2.18 Aly/REF export factor; NULL                                                        |
| LRRC58           | 2.17 leucine rich repeat containing 58; NULL                                            |
| SIAH2            | 2.17 siah E3 ubiquitin protein ligase 2; NULL                                           |
| SNORA38          | 2.17 small nucleolar RNA, H/ACA box 38                                                  |
| RNU6ATAC         | 2.17 RNA, U6atac small nuclear (U12-dependent splicing)                                 |
| WDR83OS          | 2.17 WD repeat domain 83 opposite strand                                                |
| SNORA38          | 2.17 small nucleolar RNA, H/ACA box 38                                                  |
| SNORA38          | 2.17 small nucleolar RNA, H/ACA box 38                                                  |
| SNORA38          | 2.17 small nucleolar RNA, H/ACA box 38                                                  |
| SNORA38          | 2.17 small nucleolar RNA, H/ACA box 38                                                  |
| ZZZ3             | 2.16 zinc finger, ZZ-type containing 3; NULL                                            |
| MED10            | 2.16 mediator complex subunit 10; NULL                                                  |
| C11orf58         | 2.16 chromosome 11 open reading frame 58                                                |
| DDIT3            | 2.16 DNA-damage-inducible transcript 3                                                  |
| METTL21D         | 2.16 methyltransferase like 21D; NULL                                                   |
| SECISBP2L        | 2.16 SECIS binding protein 2-like                                                       |
| SNORD1A          | 2.16 small nucleolar RNA, C/D box 1A                                                    |
| SCARNA6          | 2.15 small Cajal body-specific RNA 6                                                    |
| ISY1             | 2.15 ISY1 splicing factor homolog ( <i>S. cerevisiae</i> ); NULL                        |
| MIR3143          | 2.15 microRNA 3143                                                                      |
| SNORD11          | 2.14 small nucleolar RNA, C/D box 11                                                    |
| C16orf80         | 2.14 chromosome 16 open reading frame 80; NULL                                          |
| PEX12            | 2.14 peroxisomal biogenesis factor 12; NULL                                             |
| FBXO28           | 2.13 F-box protein 28; NULL                                                             |
| ATF1             | 2.13 activating transcription factor 1                                                  |
| TAF1A            | 2.12 TATA box binding protein (TBP)-associated factor, RNA polymerase I, A, 48kDa; NULL |
| HMGB2            | 2.12 high mobility group box 2; NULL                                                    |
| IER3             | 2.12 immediate early response 3; NULL                                                   |
| GLO1             | 2.12 glyoxalase I; NULL                                                                 |
| RNU6-44          | 2.12 RNA, U6 small nuclear 44                                                           |
| BNIP2            | 2.12 BCL2/adenovirus E1B 19kDa interacting protein 2; NULL                              |
| TMEM33           | 2.11 transmembrane protein 33; NULL                                                     |
| SNORA84; MIR3651 | 2.11 small nucleolar RNA, H/ACA box 84; microRNA 3651                                   |

|                       |                                                                                                 |
|-----------------------|-------------------------------------------------------------------------------------------------|
| SSX3                  | 2.11 synovial sarcoma, X breakpoint 3; NULL                                                     |
| SNORA76               | 2.11 small nucleolar RNA, H/ACA box 76                                                          |
| SNRPD1                | 2.11 small nuclear ribonucleoprotein D1 polypeptide 16kDa                                       |
| KIAA0907              | 2.1 KIAA0907; NULL                                                                              |
| EAF1                  | 2.1 ELL associated factor 1; NULL                                                               |
| C10orf2               | 2.1 chromosome 10 open reading frame 2; NULL                                                    |
| BIRC5                 | 2.1 baculoviral IAP repeat containing 5                                                         |
| ZNF557                | 2.1 zinc finger protein 557                                                                     |
| RNU6-8                | 2.09 RNA, U6 small nuclear 8                                                                    |
| SNHG8                 | 2.09 small nucleolar RNA host gene 8 (non-protein coding)                                       |
| ZFAND2A               | 2.09 zinc finger, AN1-type domain 2A; NULL                                                      |
| RBM18                 | 2.09 RNA binding motif protein 18; NULL                                                         |
| BTBD7                 | 2.08 BTB (POZ) domain containing 7                                                              |
| SNORA80               | 2.08 small nucleolar RNA, H/ACA box 80                                                          |
| NGDN                  | 2.07 neuroguidin, EIF4E binding protein                                                         |
| NIPA2                 | 2.07 non imprinted in Prader-Willi/Angelman syndrome 2; NULL                                    |
| H3F3A; H3F3AP4; H3F3B | H3 histone, family 3A; H3 histone, family 3A, pseudogene 4; H3 histone, family 3B (H3.3B); NULL |
| RPS26; LOC100996747   | 2.06 ribosomal protein S26; 40S ribosomal protein S26-like                                      |
| SNORD53               | 2.05 small nucleolar RNA, C/D box 53                                                            |
| CENPQ                 | 2.05 centromere protein Q; NULL                                                                 |
| MIR3153               | 2.05 microRNA 3153                                                                              |
| RNU6-49               | 2.05 RNA, U6 small nuclear 49                                                                   |
| SSX5                  | 2.05 synovial sarcoma, X breakpoint 5; NULL                                                     |
| C1orf63               | 2.03 chromosome 1 open reading frame 63; NULL                                                   |
| SNORD70               | 2.03 small nucleolar RNA, C/D box 70                                                            |
| PRPF4B                | 2.03 PRP4 pre-mRNA processing factor 4 homolog B (yeast); NULL                                  |
| MPZL3                 | 2.03 myelin protein zero-like 3                                                                 |
| CENPV                 | 2.03 centromere protein V; NULL                                                                 |
| SNORA68               | 2.03 small nucleolar RNA, H/ACA box 68                                                          |
| CRCP                  | 2.02 CGRP receptor component; NULL                                                              |
| RNU6-38               | 2.02 RNA, U6 small nuclear 38                                                                   |
| CYB5D1                | 2.02 cytochrome b5 domain containing 1                                                          |
| RNU6-4                | 2.01 RNA, U6 small nuclear 4                                                                    |
| YY2                   | 2.01 YY2 transcription factor; NULL                                                             |
| WEE1                  | 2.01 WEE1 homolog ( <i>S. pombe</i> )                                                           |
| DDX47                 | 2.01 DEAD (Asp-Glu-Ala-Asp) box polypeptide 47                                                  |

|               |                                                                                                                                    |
|---------------|------------------------------------------------------------------------------------------------------------------------------------|
| SNORA21       | 2.01 small nucleolar RNA, H/ACA box 21                                                                                             |
| RNU6-39P      | 2.01 RNA, U6 small nuclear 39, pseudogene                                                                                          |
| ARNT          | -2.01 aryl hydrocarbon receptor nuclear translocator;<br>NULL                                                                      |
| SMARCAD1      | -2.01 SWI/SNF-related, matrix-associated actin-<br>dependent regulator of chromatin, subfamily a,<br>containing DEAD/H box 1; NULL |
| KIAA1191      | -2.01 KIAA1191; NULL                                                                                                               |
| HERC4         | -2.01 HECT and RLD domain containing E3<br>ubiquitin protein ligase 4; NULL                                                        |
| POLR3B        | -2.01 polymerase (RNA) III (DNA directed)<br>polypeptide B                                                                         |
| SMARCC2       | -2.01 SWI/SNF related, matrix associated, actin<br>dependent regulator of chromatin, subfamily c,<br>member 2                      |
| C18orf54      | -2.01 chromosome 18 open reading frame 54; NULL                                                                                    |
| TNRC6B        | -2.01 trinucleotide repeat containing 6B; NULL                                                                                     |
| LRPPRC        | -2.02 leucine-rich pentatricopeptide repeat<br>containing; NULL                                                                    |
| EIF2AK3       | -2.02 eukaryotic translation initiation factor 2-alpha<br>kinase 3; NULL                                                           |
| PPARGC1A      | -2.02 peroxisome proliferator-activated receptor<br>gamma, coactivator 1 alpha; NULL                                               |
| SPDL1; CCDC99 | -2.02 spindle apparatus coiled-coil protein 1; coiled-<br>coil domain containing 99; NULL                                          |
| CCDC125       | -2.02 coiled-coil domain containing 125; NULL                                                                                      |
| CGA           | -2.02 glycoprotein hormones, alpha polypeptide                                                                                     |
| ZNF138        | -2.02 zinc finger protein 138; NULL                                                                                                |
| KIAA0196      | -2.02 KIAA0196; NULL                                                                                                               |
| ZCCHC6        | -2.02 zinc finger, CCHC domain containing 6; NULL                                                                                  |
| CHD4          | -2.02 chromodomain helicase DNA binding protein 4                                                                                  |
| CSRP2         | -2.02 cysteine and glycine-rich protein 2                                                                                          |
| EDC3          | -2.02 enhancer of mRNA decapping 3; NULL                                                                                           |
| DOCK7         | -2.03 dedicator of cytokinesis 7; NULL                                                                                             |
| CHML          | -2.03 choroideremia-like (Rab escort protein 2);                                                                                   |
| KAT2B         | -2.03 K(lysine) acetyltransferase 2B; NULL                                                                                         |
| HAUS6         | -2.03 HAUS augmin-like complex, subunit 6; NULL                                                                                    |
| IDE           | -2.03 insulin-degrading enzyme; NULL                                                                                               |
| CRY1          | -2.03 cryptochrome 1 (photolyase-like)                                                                                             |
| COG6          | -2.03 component of oligomeric golgi complex 6;                                                                                     |
| TRIP11        | -2.03 thyroid hormone receptor interactor 11                                                                                       |
| ELP2          | -2.03 elongator acetyltransferase complex subunit 2;<br>NULL                                                                       |



|                                                    |                                                                                                                                        |
|----------------------------------------------------|----------------------------------------------------------------------------------------------------------------------------------------|
| SMC6                                               | -2.04 structural maintenance of chromosomes 6;                                                                                         |
| OTTHUMG00000013250;<br>RP11-187C18.2               | -2.04 NULL                                                                                                                             |
| NAA35                                              | -2.04 N(alpha)-acetyltransferase 35, NatC auxiliary subunit; NULL                                                                      |
| TMEM133                                            | -2.04 transmembrane protein 133                                                                                                        |
| C11orf71                                           | -2.04 chromosome 11 open reading frame 71                                                                                              |
| COQ10A                                             | -2.04 coenzyme Q10 homolog A ( <i>S. cerevisiae</i> )                                                                                  |
| VPS13C                                             | -2.04 vacuolar protein sorting 13 homolog C ( <i>S. cerevisiae</i> ); NULL                                                             |
| PARN                                               | -2.04 poly(A)-specific ribonuclease                                                                                                    |
| TOM1L1                                             | -2.04 target of myb1 (chicken)-like 1                                                                                                  |
| KIAA1109                                           | -2.05 KIAA1109; NULL                                                                                                                   |
| HSPA4L                                             | -2.05 heat shock 70kDa protein 4-like; NULL                                                                                            |
| C5orf34                                            | -2.05 chromosome 5 open reading frame 34; NULL                                                                                         |
| CENPK                                              | -2.05 centromere protein K; NULL                                                                                                       |
| IKBKAP                                             | -2.05 inhibitor of kappa light polypeptide gene enhancer in B-cells, kinase complex-associated protein; NULL                           |
| CTPS2                                              | -2.05 CTP synthase 2; NULL                                                                                                             |
| TMEM135                                            | -2.05 transmembrane protein 135                                                                                                        |
| KIAA1377                                           | -2.05 KIAA1377                                                                                                                         |
| USH1C                                              | -2.05 Usher syndrome 1C (autosomal recessive,                                                                                          |
| RDX                                                | -2.05 radixin                                                                                                                          |
| A2M                                                | -2.05 alpha-2-macroglobulin; NULL                                                                                                      |
| SUPT6H                                             | -2.05 suppressor of Ty 6 homolog ( <i>S. cerevisiae</i> )                                                                              |
| MYH10                                              | -2.05 myosin, heavy chain 10, non-muscle; NULL                                                                                         |
| MAVS                                               | -2.05 mitochondrial antiviral signaling protein;                                                                                       |
| SEC22B; LOC100996517                               | -2.06 SEC22 vesicle trafficking protein homolog B ( <i>S. cerevisiae</i> ) (gene/pseudogene); vesicle- trafficking protein SEC22b-like |
| DISP1                                              | -2.06 dispatched homolog 1 ( <i>Drosophila</i> ); NULL                                                                                 |
| SLC30A6                                            | -2.06 solute carrier family 30 (zinc transporter), member 6; NULL                                                                      |
| EPB41L5                                            | -2.06 erythrocyte membrane protein band 4.1 like 5; NULL                                                                               |
| LOC643401;<br>OTTHUMG000000161968;<br>RP11-46C20.1 | -2.06 uncharacterized LOC643401; NULL                                                                                                  |
| PRKDC                                              | -2.06 protein kinase, DNA-activated, catalytic polypeptide; NULL                                                                       |
| INVS                                               | -2.06 inversin; NULL                                                                                                                   |
| FKTN                                               | -2.06 fukutin; NULL                                                                                                                    |

|                                                  |                                                                                           |
|--------------------------------------------------|-------------------------------------------------------------------------------------------|
| DCAF15                                           | -2.06 DDB1 and CUL4 associated factor 15                                                  |
| AGL                                              | -2.07 amylo-alpha-1, 6-glucosidase, 4-alpha-glucanotransferase; NULL                      |
| ASAP2                                            | -2.07 ArfGAP with SH3 domain, ankyrin repeat and PH domain 2; NULL                        |
| LGR4                                             | -2.07 leucine-rich repeat containing G protein-coupled receptor 4; NULL                   |
| USP2                                             | -2.07 ubiquitin specific peptidase 2                                                      |
| DENND5B                                          | -2.07 DENN/MADD domain containing 5B                                                      |
| FANCI                                            | -2.07 Fanconi anemia, complementation group I;                                            |
| GTF3C1                                           | -2.07 general transcription factor IIIC, polypeptide 1, alpha 220kDa                      |
| DNMT1                                            | -2.07 DNA (cytosine-5-)-methyltransferase 1                                               |
| COX20                                            | -2.08 COX20 cytochrome C oxidase assembly factor; NULL                                    |
| LOC100506963;<br>OTTHUMG00000002959; RP5-886K2.3 | -2.08 uncharacterized LOC100506963; NULL                                                  |
| ZCCHC11                                          | -2.08 zinc finger, CCHC domain containing 11;                                             |
| ZNF512                                           | -2.08 zinc finger protein 512; NULL                                                       |
| HLTF                                             | -2.08 helicase-like transcription factor; NULL                                            |
| OTTHUMG00000161756;<br>RP11-269F21.3             | -2.08 NULL                                                                                |
| ERBB2IP                                          | -2.08 erbb2 interacting protein; NULL                                                     |
| SNX9                                             | -2.08 sorting nexin 9; NULL                                                               |
| KIF20B                                           | -2.08 kinesin family member 20B; NULL                                                     |
| SCYL1                                            | -2.08 SCY1-like 1 ( <i>S. cerevisiae</i> )                                                |
| RAB30                                            | -2.08 RAB30, member RAS oncogene family                                                   |
| MPZL2                                            | -2.08 myelin protein zero-like 2                                                          |
| GOLGA5                                           | -2.08 golgin A5                                                                           |
| IREB2                                            | -2.08 iron-responsive element binding protein 2;                                          |
| TNFAIP1                                          | -2.08 tumor necrosis factor, alpha-induced protein 1 (endothelial); NULL                  |
| TMEM69                                           | -2.09 transmembrane protein 69; NULL                                                      |
| TRAK2                                            | -2.09 trafficking protein, kinesin binding 2; NULL                                        |
| TFAP2A                                           | -2.09 transcription factor AP-2 alpha (activating enhancer binding protein 2 alpha); NULL |
| RAET1E                                           | -2.09 retinoic acid early transcript 1E; NULL                                             |
| EMC2                                             | -2.09 ER membrane protein complex subunit 2;                                              |
| SECISBP2                                         | -2.09 SECIS binding protein 2; NULL                                                       |
| CSTF3                                            | -2.09 cleavage stimulation factor, 3' pre-RNA, subunit 3, 77kDa                           |
| AKAP13                                           | -2.09 A kinase (PRKA) anchor protein 13                                                   |

|                |                                                                                |
|----------------|--------------------------------------------------------------------------------|
| ACLY           | -2.09 ATP citrate lyase; NULL                                                  |
| SPAG9          | -2.09 sperm associated antigen 9; NULL                                         |
| HCN2           | -2.09 hyperpolarization activated cyclic nucleotide-gated potassium channel 2  |
| SHKBP1         | -2.09 SH3KBP1 binding protein 1                                                |
| CDC45          | -2.09 cell division cycle 45; NULL                                             |
| INTS3          | -2.1 integrator complex subunit 3; NULL                                        |
| CPS1           | -2.1 carbamoyl-phosphate synthase 1, mitochondrial; NULL                       |
| SORBS2         | -2.1 sorbin and SH3 domain containing 2; NULL                                  |
| VPS13A         | -2.1 vacuolar protein sorting 13 homolog A (S. cerevisiae); NULL               |
| C2CD5          | -2.1 C2 calcium-dependent domain containing 5                                  |
| NUP88          | -2.1 nucleoporin 88kDa; NULL                                                   |
| RAD23A         | -2.1 RAD23 homolog A (S. cerevisiae)                                           |
| CTPS1          | -2.11 CTP synthase 1; NULL                                                     |
| MAB21L3        | -2.11 mab-21-like 3 (C. elegans); NULL                                         |
| HES1           | -2.11 hairy and enhancer of split 1, (Drosophila);                             |
| BMP2K          | -2.11 BMP2 inducible kinase; NULL                                              |
| KIF11          | -2.11 kinesin family member 11; NULL                                           |
| MIR548AN       | -2.11 microRNA 548an                                                           |
| TARSL2         | -2.11 threonyl-tRNA synthetase-like 2; NULL                                    |
| ME2            | -2.11 malic enzyme 2, NAD(+)-dependent, mitochondrial; NULL                    |
| LAMA1          | -2.11 laminin, alpha 1; NULL                                                   |
| MN1            | -2.11 meningioma (disrupted in balanced translocation) 1; NULL                 |
| HYAL1          | -2.12 hyaluronoglucosaminidase 1; NULL                                         |
| HUWE1          | -2.12 HECT, UBA and WWE domain containing 1, E3 ubiquitin protein ligase; NULL |
| KIF18A         | -2.12 kinesin family member 18A                                                |
| PARP4          | -2.12 poly (ADP-ribose) polymerase family, member 4; NULL                      |
| SCFD1          | -2.12 sec1 family domain containing 1; NULL                                    |
| ADAT1          | -2.12 adenosine deaminase, tRNA-specific 1; NULL                               |
| CCDC18         | -2.13 coiled-coil domain containing 18; NULL                                   |
| SAP130         | -2.13 Sin3A-associated protein, 130kDa; NULL                                   |
| CDC23          | -2.13 cell division cycle 23; NULL                                             |
| BMS1           | -2.13 BMS1 ribosome biogenesis factor; NULL                                    |
| FAM45A; FAM45B | -2.13 family with sequence similarity 45, member A pseudogene; NULL            |
| KIAA1731       | -2.13 KIAA1731                                                                 |

|                                    |                                                                                    |
|------------------------------------|------------------------------------------------------------------------------------|
| EMP1                               | -2.13 epithelial membrane protein 1                                                |
| MED29                              | -2.13 mediator complex subunit 29                                                  |
| OTTHUMG00000010753; RP4-714D9.2    | -2.14 NULL                                                                         |
| LRRC16A                            | -2.14 leucine rich repeat containing 16A; NULL                                     |
| KLHDC3                             | -2.14 kelch domain containing 3; NULL                                              |
| TGFBR1                             | -2.14 transforming growth factor, beta receptor 1;                                 |
| NPY4R; LOC100996758;               | -2.14 neuropeptide Y receptor Y4; neuropeptide Y                                   |
| PPYR1                              | receptor type 4-like; NULL                                                         |
| DCLRE1A                            | -2.14 DNA cross-link repair 1A; NULL                                               |
| RDH11                              | -2.14 retinol dehydrogenase 11 (all-trans/9-cis/11-cis)                            |
| TUBG1                              | -2.14 tubulin, gamma 1                                                             |
| CHAF1B                             | -2.14 chromatin assembly factor 1, subunit B (p60); NULL                           |
| ANKRD28                            | -2.15 ankyrin repeat domain 28; NULL                                               |
| GOLIM4                             | -2.15 golgi integral membrane protein 4; NULL                                      |
| NEK1                               | -2.15 NIMA-related kinase 1; NULL                                                  |
| LRRC1                              | -2.15 leucine rich repeat containing 1; NULL                                       |
| TPP2                               | -2.15 tripeptidyl peptidase II; NULL                                               |
| EPB41                              | -2.16 erythrocyte membrane protein band 4.1 (elliptocytosis 1, RH-linked); NULL    |
| OTTHUMG000000161676; RP11-164P12.5 | -2.16 NULL                                                                         |
| RWDD4                              | -2.16 RWD domain containing 4; NULL                                                |
| PJA2                               | -2.16 praja ring finger 2, E3 ubiquitin protein ligase; NULL                       |
| PGM3                               | -2.16 phosphoglucomutase 3; NULL                                                   |
| EZH2                               | -2.16 enhancer of zeste homolog 2 (Drosophila);                                    |
| COQ9                               | -2.16 coenzyme Q9 homolog (S. cerevisiae)                                          |
| SLC16A4                            | -2.17 solute carrier family 16, member 4 (monocarboxylic acid transporter 5); NULL |
| CLASP1                             | -2.17 cytoplasmic linker associated protein 1; NULL                                |
| CXorf61                            | -2.17 chromosome X open reading frame 61; NULL                                     |
| FNDC3A                             | -2.17 fibronectin type III domain containing 3A;                                   |
| RBL2                               | -2.17 retinoblastoma-like 2 (p130); NULL                                           |
| MED11                              | -2.17 mediator complex subunit 11                                                  |
| SLFN5                              | -2.17 schlafen family member 5                                                     |
| VRK3                               | -2.17 vaccinia related kinase 3                                                    |
| OTTHUMG000000165064; RP11-255B23.4 | -2.18 NULL                                                                         |
| USP9X                              | -2.18 ubiquitin specific peptidase 9, X-linked; NULL                               |
| BBIP1                              | -2.18 BBSome interacting protein 1; NULL                                           |

|                                             |                                                                                                                  |
|---------------------------------------------|------------------------------------------------------------------------------------------------------------------|
| PUS7L                                       | -2.18 pseudouridylate synthase 7 homolog (S. cerevisiae)-like                                                    |
| LINC00052                                   | -2.18 long intergenic non-protein coding RNA 52                                                                  |
| TMEM189; TMEM189-<br>UBE2V1; UBE2V1         | -2.18 transmembrane protein 189; TMEM189-<br>UBE2V1 readthrough; ubiquitin-conjugating enzyme E2 variant 1; NULL |
| CLCA2                                       | -2.19 chloride channel accessory 2; NULL                                                                         |
| MTOR                                        | -2.19 mechanistic target of rapamycin (serine/threonine kinase); NULL                                            |
| PLEKHG1                                     | -2.19 pleckstrin homology domain containing, family G (with RhoGef domain) member 1; NULL                        |
| PRR11                                       | -2.19 proline rich 11                                                                                            |
| COPA                                        | -2.2 coatomer protein complex, subunit alpha;                                                                    |
| TM4SF1-AS1                                  | -2.2 TM4SF1 antisense RNA 1; NULL                                                                                |
| OTTHUMG00000159595;<br>RP11-278L15.2        | -2.2 NULL                                                                                                        |
| ANKRD32                                     | -2.2 ankyrin repeat domain 32; NULL                                                                              |
| LINC00473                                   | -2.2 long intergenic non-protein coding RNA 473; NULL                                                            |
| PTER                                        | -2.2 phosphotriesterase related; NULL                                                                            |
| SLC35C2                                     | -2.2 solute carrier family 35, member C2; NULL                                                                   |
| INADL                                       | -2.21 InaD-like (Drosophila); NULL                                                                               |
| CLSPN                                       | -2.21 claspin; NULL                                                                                              |
| YAE1D1                                      | -2.21 Yae1 domain containing 1; NULL                                                                             |
| SMIM2-AS1                                   | -2.21 SMIM2 antisense RNA 1; NULL                                                                                |
| LAMA3                                       | -2.21 laminin, alpha 3; NULL                                                                                     |
| CASP14                                      | -2.21 caspase 14, apoptosis-related cysteine peptidase                                                           |
| ARHGAP29                                    | -2.22 Rho GTPase activating protein 29; NULL                                                                     |
| RFESD                                       | -2.22 Rieske (Fe-S) domain containing; NULL                                                                      |
| OTTHUMG00000163343; CTB-<br>43E15.3         | -2.22 NULL                                                                                                       |
| KRIT1;<br>OTTHUMG00000155860;<br>AC000120.7 | -2.22 KRIT1, ankyrin repeat containing; NULL                                                                     |
| ZMYM2                                       | -2.22 zinc finger, MYM-type 2; NULL                                                                              |
| TMC7                                        | -2.22 transmembrane channel-like 7; NULL                                                                         |
| WIPI1                                       | -2.22 WD repeat domain, phosphoinositide                                                                         |
| THOC1                                       | -2.22 THO complex 1                                                                                              |
| IGF2R                                       | -2.23 insulin-like growth factor 2 receptor; NULL                                                                |
| MYBL1                                       | -2.23 v-myb myeloblastosis viral oncogene homolog (avian)-like 1; NULL                                           |
| IDH3A                                       | -2.23 isocitrate dehydrogenase 3 (NAD+) alpha;                                                                   |
| TLR3                                        | -2.24 toll-like receptor 3; NULL                                                                                 |

|                                  |                                                                                             |
|----------------------------------|---------------------------------------------------------------------------------------------|
| PPP1R12A                         | -2.24 protein phosphatase 1, regulatory subunit 12A                                         |
| HEATR1                           | -2.25 HEAT repeat containing 1; NULL                                                        |
| ANKRD36; ANKRD36C                | -2.25 ankyrin repeat domain 36; ankyrin repeat domain 36C; NULL                             |
| SPINK13                          | -2.25 serine peptidase inhibitor, Kazal type 13 (putative); NULL                            |
| ISCA1P1                          | -2.25 iron-sulfur cluster assembly 1 homolog ( <i>S. cerevisiae</i> ) pseudogene 1          |
| UBR5                             | -2.25 ubiquitin protein ligase E3 component n-recognin 5; NULL                              |
| CDKL5                            | -2.25 cyclin-dependent kinase-like 5; NULL                                                  |
| RTKN2                            | -2.25 rhotekin 2; NULL                                                                      |
| PDE3B                            | -2.25 phosphodiesterase 3B, cGMP-inhibited                                                  |
| WNK1                             | -2.25 WNK lysine deficient protein kinase 1; NULL                                           |
| CAMK1G                           | -2.26 calcium/calmodulin-dependent protein kinase IG; NULL                                  |
| MYO6                             | -2.26 myosin VI; NULL                                                                       |
| KIAA0368                         | -2.26 KIAA0368; NULL                                                                        |
| METTL7A                          | -2.26 methyltransferase like 7A                                                             |
| UBA2                             | -2.26 ubiquitin-like modifier activating enzyme 2                                           |
| UBE4B                            | -2.27 ubiquitination factor E4B; NULL                                                       |
| DRAM2                            | -2.27 DNA-damage regulated autophagy modulator 2; NULL                                      |
| AGFG1                            | -2.27 ArfGAP with FG repeats 1; NULL                                                        |
| NMD3                             | -2.27 NMD3 homolog ( <i>S. cerevisiae</i> ); NULL                                           |
| PDE8B                            | -2.27 phosphodiesterase 8B; NULL                                                            |
| C6orf203                         | -2.27 chromosome 6 open reading frame 203; NULL                                             |
| UST                              | -2.27 uronyl-2-sulfotransferase; NULL                                                       |
| OTTHUMG00000164738; KB-1991G8.1  | -2.27 NULL                                                                                  |
| ARFGEF1                          | -2.27 ADP-ribosylation factor guanine nucleotide-exchange factor 1 (brefeldin A-inhibited); |
| OTTHUMG00000019964; RP11-88I18.2 | -2.27 NULL                                                                                  |
| NBEAL1; LOC648771                | -2.28 neurobeachin-like 1; 60S ribosomal protein L12-like; NULL                             |
| GBF1                             | -2.28 golgi brefeldin A resistant guanine nucleotide exchange factor 1; NULL                |
| SLC43A3                          | -2.28 solute carrier family 43, member 3                                                    |
| KDM5B                            | -2.29 lysine (K)-specific demethylase 5B; NULL                                              |
| PSME4                            | -2.29 proteasome (prosome, macropain) activator subunit 4; NULL                             |
| WDR48                            | -2.29 WD repeat domain 48; NULL                                                             |

|                                                  |                                                                                                         |
|--------------------------------------------------|---------------------------------------------------------------------------------------------------------|
| CCNG1                                            | -2.29 cyclin G1; NULL                                                                                   |
| ANKRD52                                          | -2.29 ankyrin repeat domain 52                                                                          |
| CDC42BPB                                         | -2.29 CDC42 binding protein kinase beta (DMPK-                                                          |
| NF1                                              | -2.29 neurofibromin 1; NULL                                                                             |
| EML4                                             | -2.3 echinoderm microtubule associated protein like<br>4; NULL                                          |
| RICTOR                                           | -2.3 RPTOR independent companion of MTOR,<br>complex 2; NULL                                            |
| OTTHUMG00000018428;<br>RP11-472G21.2             | -2.3 NULL                                                                                               |
| PNRC2; LOC100996626                              | -2.31 proline-rich nuclear receptor coactivator 2;<br>proline-rich nuclear receptor coactivator 2-like; |
| DOCK10                                           | -2.31 dedicator of cytokinesis 10; NULL                                                                 |
| HMMR                                             | -2.31 hyaluronan-mediated motility receptor<br>(RHAMM); NULL                                            |
| UTRN                                             | -2.31 utrophin; NULL                                                                                    |
| STK38                                            | -2.31 serine/threonine kinase 38; NULL                                                                  |
| ZC2HC1A                                          | -2.31 zinc finger, C2HC-type containing 1A; NULL                                                        |
| TLN1                                             | -2.31 talin 1; NULL                                                                                     |
| DOCK11                                           | -2.31 dedicator of cytokinesis 11; NULL                                                                 |
| LOC92249;<br>OTTHUMG00000021699;<br>RP11-357C3.3 | -2.31 uncharacterized LOC92249; NULL                                                                    |
| PKP2                                             | -2.31 plakophilin 2                                                                                     |
| SLC12A6                                          | -2.31 solute carrier family 12 (potassium/chloride<br>transporters), member 6; NULL                     |
| GFPT1                                            | -2.32 glutamine--fructose-6-phosphate transaminase<br>1; NULL                                           |
| ZNF860                                           | -2.32 zinc finger protein 860; NULL                                                                     |
| AHR                                              | -2.32 aryl hydrocarbon receptor; NULL                                                                   |
| VIPAS39                                          | -2.32 VPS33B interacting protein, apical-basolateral<br>polarity regulator, spe-39 homolog              |
| OTTHUMG00000073673;<br>RP11-126K1.8              | -2.33 NULL                                                                                              |
| RHOB                                             | -2.33 ras homolog family member B; NULL                                                                 |
| MME                                              | -2.33 membrane metallo-endopeptidase; NULL                                                              |
| OGDH                                             | -2.33 oxoglutarate (alpha-ketoglutarate)<br>dehydrogenase (lipoamide); NULL                             |
| ATAD2                                            | -2.33 ATPase family, AAA domain containing 2;                                                           |
| INSL4                                            | -2.33 insulin-like 4 (placenta); NULL                                                                   |
| FBXO18                                           | -2.33 F-box protein, helicase, 18; NULL                                                                 |
| ADD3                                             | -2.33 adducin 3 (gamma); NULL                                                                           |
| ARHGAP12                                         | -2.33 Rho GTPase activating protein 12; NULL                                                            |

|                                       |                                                                                         |
|---------------------------------------|-----------------------------------------------------------------------------------------|
| MCAM                                  | -2.33 melanoma cell adhesion molecule                                                   |
| PIP5K1                                | -2.33 diphosphoinositol pentakisphosphate kinase 1                                      |
| METTL23                               | -2.33 methyltransferase like 23                                                         |
| AFF1                                  | -2.34 AF4/FMR2 family, member 1; NULL                                                   |
| DAB2                                  | -2.34 Dab, mitogen-responsive phosphoprotein, homolog 2 (Drosophila); NULL              |
| DENND4C                               | -2.34 DENN/MADD domain containing 4C; NULL                                              |
| CDC27                                 | -2.34 cell division cycle 27                                                            |
| GPSM2                                 | -2.35 G-protein signaling modulator 2; NULL                                             |
| KIAA0922                              | -2.35 KIAA0922; NULL                                                                    |
| TRAPPC11                              | -2.35 trafficking protein particle complex 11; NULL                                     |
| PCSK1                                 | -2.35 proprotein convertase subtilisin/kexin type 1; NULL                               |
| SLK                                   | -2.35 STE20-like kinase; NULL                                                           |
| GOT1                                  | -2.35 glutamic-oxaloacetic transaminase 1, soluble (aspartate aminotransferase 1); NULL |
| MYO19                                 | -2.35 myosin XIX                                                                        |
| MOCOS                                 | -2.35 molybdenum cofactor sulfurase; NULL                                               |
| UBR4                                  | -2.36 ubiquitin protein ligase E3 component n-recognin 4; NULL                          |
| ECT2                                  | -2.36 epithelial cell transforming sequence 2 oncogene; NULL                            |
| LDB1                                  | -2.36 LIM domain binding 1; NULL                                                        |
| ARNTL                                 | -2.36 aryl hydrocarbon receptor nuclear translocator-like; NULL                         |
| CSE1L                                 | -2.36 CSE1 chromosome segregation 1-like (yeast); NULL                                  |
| HCP5                                  | -2.36 HLA complex P5 (non-protein coding); NULL                                         |
| PEX3                                  | -2.37 peroxisomal biogenesis factor 3; NULL                                             |
| NAV2                                  | -2.37 neuron navigator 2; NULL                                                          |
| MRPL24                                | -2.38 mitochondrial ribosomal protein L24; NULL                                         |
| OTTHUMG00000154381;<br>AC064834.2     | -2.38 NULL                                                                              |
| LOC100996862; ANKRD36C                | -2.38 ankyrin repeat domain-containing protein 36A-like; NULL                           |
| FCHO2                                 | -2.38 FCH domain only 2; NULL                                                           |
| OTTHUMG00000014752; RP5-<br>1120P11.1 | -2.38 NULL                                                                              |
| CHD9                                  | -2.38 chromodomain helicase DNA binding protein 9                                       |
| PITPNA                                | -2.38 phosphatidylinositol transfer protein, alpha                                      |
| DPM1                                  | -2.38 dolichyl-phosphate mannosyltransferase polypeptide 1, catalytic subunit; NULL     |



|                   |                                                                                                                  |
|-------------------|------------------------------------------------------------------------------------------------------------------|
| PHLDB2            | -2.39 pleckstrin homology-like domain, family B, member 2; NULL                                                  |
| DST; LOC100652766 | -2.39 dystonin; dystonin-like; NULL                                                                              |
| PNRC2             | -2.39 proline-rich nuclear receptor coactivator 2                                                                |
| KLRC3             | -2.39 killer cell lectin-like receptor subfamily C, member 3                                                     |
| MPHOSPH9          | -2.39 M-phase phosphoprotein 9                                                                                   |
| TMEM131           | -2.4 transmembrane protein 131; NULL                                                                             |
| ORC2              | -2.4 origin recognition complex, subunit 2; NULL                                                                 |
| DZIP3             | -2.4 DAZ interacting zinc finger protein 3; DAZ interacting protein 3, zinc finger; NULL                         |
| SUPT20H; FAM48A   | suppressor of Ty 20 homolog ( <i>S. cerevisiae</i> );<br>-2.4 family with sequence similarity 48, member A; NULL |
| MYO9A             | -2.4 myosin IXA; NULL                                                                                            |
| DHPS              | -2.4 deoxyhypusine synthase                                                                                      |
| ROBO1             | -2.41 roundabout, axon guidance receptor, homolog 1 ( <i>Drosophila</i> ); NULL                                  |
| MPDZ              | -2.41 multiple PDZ domain protein; NULL                                                                          |
| NUP160            | -2.41 nucleoporin 160kDa                                                                                         |
| MMP12             | -2.41 matrix metalloproteinase 12 (macrophage                                                                    |
| AKTIP             | -2.41 AKT interacting protein; NULL                                                                              |
| DDX42             | -2.41 DEAD (Asp-Glu-Ala-Asp) box helicase 42                                                                     |
| PITPNC1           | -2.41 phosphatidylinositol transfer protein,                                                                     |
| AGPS              | -2.42 alkylglycerone phosphate synthase; NULL                                                                    |
| ALG1L13P          | -2.42 asparagine-linked glycosylation 1-like 13, pseudogene                                                      |
| FSTL3             | -2.42 follistatin-like 3 (secreted glycoprotein)                                                                 |
| EEA1              | -2.43 early endosome antigen 1                                                                                   |
| FAM208A           | -2.44 family with sequence similarity 208, member A; NULL                                                        |
| UBA3              | -2.44 ubiquitin-like modifier activating enzyme 3;                                                               |
| SPTAN1            | -2.44 spectrin, alpha, non-erythrocytic 1; NULL                                                                  |
| MYPN              | -2.44 myopalladin; NULL                                                                                          |
| KIF21A            | -2.44 kinesin family member 21A                                                                                  |
| SLC41A2           | -2.44 solute carrier family 41, member 2; NULL                                                                   |
| COQ5              | -2.44 coenzyme Q5 homolog, methyltransferase ( <i>S. cerevisiae</i> )                                            |
| DENND4A           | -2.44 DENN/MADD domain containing 4A                                                                             |
| CTC1              | -2.44 CTS telomere maintenance complex component                                                                 |
| CDC42BPA          | -2.45 CDC42 binding protein kinase alpha (DMPK-like); NULL                                                       |
| MYO1E             | -2.45 myosin IE                                                                                                  |

|                    |                                                                                               |
|--------------------|-----------------------------------------------------------------------------------------------|
| DESI1              | -2.45 desumoylating isopeptidase 1; NULL                                                      |
| FNBP1L             | -2.46 formin binding protein 1-like; NULL                                                     |
| RHOQP2             | -2.46 ras homolog family member Q pseudogene 2                                                |
| DDX60              | -2.46 DEAD (Asp-Glu-Ala-Asp) box polypeptide 60; NULL                                         |
| RAD17              | -2.46 RAD17 homolog ( <i>S. pombe</i> ); NULL                                                 |
| PPP3CB             | -2.46 protein phosphatase 3, catalytic subunit, beta isozyme; NULL                            |
| TPR                | -2.47 translocated promoter region, nuclear basket protein; NULL                              |
| PEX1               | -2.47 peroxisomal biogenesis factor 1; NULL                                                   |
| MYBL2              | -2.47 v-myb myeloblastosis viral oncogene homolog (avian)-like 2; NULL                        |
| POLA2              | -2.48 polymerase (DNA directed), alpha 2, accessory subunit                                   |
| TPCN1              | -2.49 two pore segment channel 1                                                              |
| SNX1               | -2.49 sorting nexin 1                                                                         |
| KRCC1              | -2.5 lysine-rich coiled-coil 1; NULL                                                          |
| TJP1               | -2.5 tight junction protein 1; NULL                                                           |
| PITPNA-AS1         | -2.5 PITPNA antisense RNA 1; NULL                                                             |
| ATP2B4             | -2.51 ATPase, Ca <sup>++</sup> transporting, plasma membrane 4; NULL                          |
| C10orf76           | -2.51 chromosome 10 open reading frame 76; NULL                                               |
| DYNC1H1            | -2.51 dynein, cytoplasmic 1, heavy chain 1                                                    |
| TOP2A              | -2.51 topoisomerase (DNA) II alpha 170kDa; NULL                                               |
| AHCYL1             | -2.52 adenosylhomocysteinase-like 1; NULL                                                     |
| SLC35A5            | -2.52 solute carrier family 35, member A5; NULL                                               |
| FER                | -2.52 fer (fps/fes related) tyrosine kinase; NULL                                             |
| PPFIBP1            | -2.52 PTPRF interacting protein, binding protein 1 (liprin beta 1)                            |
| NRG4               | -2.52 neuregulin 4; NULL                                                                      |
| RSPRY1             | -2.52 ring finger and SPRY domain containing 1;                                               |
| ZCCHC17            | -2.53 zinc finger, CCHC domain containing 17;                                                 |
| RAB3GAP2; AURKAPS1 | -2.53 RAB3 GTPase activating protein subunit 2 (non-catalytic); aurora kinase A pseudogene 1; |
| LIPH               | -2.53 lipase, member H; NULL                                                                  |
| SAMD9              | -2.54 sterile alpha motif domain containing 9; NULL                                           |
| LINC00294          | -2.54 long intergenic non-protein coding RNA 294                                              |
| SASS6              | -2.55 spindle assembly 6 homolog ( <i>C. elegans</i> );                                       |
| SMC4               | -2.55 structural maintenance of chromosomes 4;                                                |
| TRIP13             | -2.55 thyroid hormone receptor interactor 13; NULL                                            |

|                                     |       |                                                                                                                                              |
|-------------------------------------|-------|----------------------------------------------------------------------------------------------------------------------------------------------|
| PIK3C2A                             | -2.55 | phosphatidylinositol-4-phosphate 3-kinase, catalytic subunit type 2 alpha; phosphoinositide-3-kinase, class 2, alpha                         |
| OIP5                                | -2.55 | Opa interacting protein 5; NULL                                                                                                              |
| AARS                                | -2.55 | alanyl-tRNA synthetase                                                                                                                       |
| ZNF831                              | -2.55 | zinc finger protein 831; NULL                                                                                                                |
| CITED4                              | -2.56 | Cbp/p300-interacting transactivator, with Glu/Asp-rich carboxy-terminal domain, 4; eukaryotic translation initiation factor 2 alpha kinase 4 |
| EIF2AK4                             | -2.56 | eukaryotic translation initiation factor 2 alpha kinase 4                                                                                    |
| RNFT1                               | -2.56 | ring finger protein, transmembrane 1; NULL                                                                                                   |
| KYNU                                | -2.57 | kynureninase; NULL                                                                                                                           |
| TCAIM                               | -2.57 | T cell activation inhibitor, mitochondrial;                                                                                                  |
| CLIP1                               | -2.57 | CAP-GLY domain containing linker protein 1                                                                                                   |
| ITPR1                               | -2.58 | inositol 1,4,5-trisphosphate receptor, type 1; NULL                                                                                          |
| C14orf162; CCDC177                  | -2.58 | chromosome 14 open reading frame 162; coiled-coil domain containing 177                                                                      |
| RAB11B-AS1                          | -2.58 | RAB11B antisense RNA 1                                                                                                                       |
| RBBP9                               | -2.58 | retinoblastoma binding protein 9; NULL                                                                                                       |
| RAP2A                               | -2.59 | RAP2A, member of RAS oncogene family;                                                                                                        |
| U2SURP                              | -2.6  | U2 snRNP-associated SURP domain containing; NULL                                                                                             |
| MIR548W                             | -2.61 | microRNA 548w                                                                                                                                |
| HPS3                                | -2.62 | Hermansky-Pudlak syndrome 3; NULL                                                                                                            |
| ITGA2                               | -2.62 | integrin, alpha 2 (CD49B, alpha 2 subunit of VLA-2 receptor); NULL                                                                           |
| ATP2B1                              | -2.62 | ATPase, Ca <sup>++</sup> transporting, plasma membrane                                                                                       |
| LMO7                                | -2.62 | LIM domain 7; NULL                                                                                                                           |
| ATP7A                               | -2.64 | ATPase, Cu <sup>++</sup> transporting, alpha polypeptide; NULL                                                                               |
| TMEM259                             | -2.64 | transmembrane protein 259                                                                                                                    |
| ABCC2                               | -2.65 | ATP-binding cassette, sub-family C (CFTR/MRP), member 2; NULL                                                                                |
| MYLK3                               | -2.65 | myosin light chain kinase 3; NULL                                                                                                            |
| OTTHUMG00000159786;<br>RP11-85F14.5 | -2.66 | NULL                                                                                                                                         |
| KLHDC2                              | -2.66 | kelch domain containing 2; NULL                                                                                                              |
| NCAPD3                              | -2.67 | non-SMC condensin II complex, subunit D3                                                                                                     |
| FAM83B                              | -2.68 | family with sequence similarity 83, member B; NULL                                                                                           |
| WDHD1                               | -2.68 | WD repeat and HMG-box DNA binding protein 1; NULL                                                                                            |

|                                                    |                                                                                              |
|----------------------------------------------------|----------------------------------------------------------------------------------------------|
| OTTHUMG00000163317;<br>RP11-195E2.4                | -2.7 NULL                                                                                    |
| NF1P5                                              | -2.71 neurofibromin 1 pseudogene 5                                                           |
| CRYBG3                                             | -2.73 beta-gamma crystallin domain containing 3                                              |
| OTTHUMG00000132913;<br>AC012146.7                  | -2.73 NULL                                                                                   |
| STAM2                                              | -2.75 signal transducing adaptor molecule (SH3 domain and ITAM motif) 2; NULL                |
| CENPI                                              | -2.75 centromere protein I; NULL                                                             |
| FAM5C                                              | -2.76 family with sequence similarity 5, member C; NULL                                      |
| CCDC88A                                            | -2.76 coiled-coil domain containing 88A; NULL                                                |
| JAGN1                                              | -2.76 jagunal homolog 1 (Drosophila); NULL                                                   |
| TAF11                                              | -2.76 TAF11 RNA polymerase II, TATA box binding protein (TBP)-associated factor, 28kDa; NULL |
| UFL1                                               | -2.78 UFM1-specific ligase 1; NULL                                                           |
| LINC00958                                          | -2.78 long intergenic non-protein coding RNA 958                                             |
| KNTC1                                              | -2.79 kinetochore associated 1                                                               |
| SH3PXD2B                                           | -2.8 SH3 and PX domains 2B; NULL                                                             |
| ARHGAP21                                           | -2.81 Rho GTPase activating protein 21; NULL                                                 |
| CKAP5                                              | -2.81 cytoskeleton associated protein 5                                                      |
| TRANK1                                             | -2.82 tetratricopeptide repeat and ankyrin repeat containing 1; NULL                         |
| DLGAP1-AS1                                         | -2.82 DLGAP1 antisense RNA 1                                                                 |
| IBTK                                               | -2.83 inhibitor of Bruton agammaglobulinemia tyrosine kinase; NULL                           |
| ZWILCH                                             | -2.83 zwilch kinetochore protein; NULL                                                       |
| NAE1                                               | -2.84 NEDD8 activating enzyme E1 subunit 1; NULL                                             |
| FLVCR2                                             | -2.85 feline leukemia virus subgroup C cellular receptor family, member 2                    |
| BRIP1                                              | -2.87 BRCA1 interacting protein C-terminal helicase                                          |
| NDRG3                                              | -2.87 NDRG family member 3; NULL                                                             |
| LOC100505876;<br>OTTHUMG00000152162;<br>AC007390.5 | -2.89 uncharacterized LOC100505876; NULL                                                     |
| FAM114A1                                           | -2.89 family with sequence similarity 114, member A1; NULL                                   |
| ZDHHC16                                            | -2.89 zinc finger, DHHC-type containing 16; NULL                                             |
| ADAL                                               | -2.89 adenosine deaminase-like                                                               |
| OTTHUMG00000163424; CTC-<br>295J13.3               | -2.91 NULL                                                                                   |
| PDK4                                               | -2.91 pyruvate dehydrogenase kinase, isozyme 4;                                              |
| USO1                                               | -2.92 USO1 vesicle transport factor; NULL                                                    |

|                                                |       |                                                                     |
|------------------------------------------------|-------|---------------------------------------------------------------------|
| CCAT1;<br>OTTHUMG00000165065;<br>RP11-255B23.3 | -2.93 | colon cancer associated transcript 1 (non-protein coding); NULL     |
| ITGA5                                          | -2.93 | integrin, alpha 5 (fibronectin receptor, alpha polypeptide)         |
| ENOX2<br>OTTHUMG00000154423;<br>AC009948.5     | -2.94 | ecto-NOX disulfide-thiol exchanger 2; NULL                          |
| LIMCH1                                         | -2.95 | LIM and calponin homology domains 1; NULL                           |
| APPBP2                                         | -2.96 | amyloid beta precursor protein (cytoplasmic tail) binding protein 2 |
| PPP2R3A                                        | -2.97 | protein phosphatase 2, regulatory subunit B", alpha; NULL           |
| DPH5                                           | -2.98 | diphthamide biosynthesis 5; DPH5 homolog (S. cerevisiae); NULL      |
| WDR44                                          | -2.98 | WD repeat domain 44; NULL                                           |
| UBR1                                           | -2.99 | ubiquitin protein ligase E3 component n-recognin 1; NULL            |
| HERC5                                          | -3.02 | HECT and RLD domain containing E3 ubiquitin protein ligase 5; NULL  |
| FASN                                           | -3.02 | fatty acid synthase                                                 |
| ROCK1                                          | -3.02 | Rho-associated, coiled-coil containing protein kinase 1; NULL       |
| CRYBG3                                         | -3.03 | beta-gamma crystallin domain containing 3;                          |
| MOSPD2                                         | -3.04 | motile sperm domain containing 2; NULL                              |
| SERPINB4                                       | -3.07 | serpin peptidase inhibitor, clade B (ovalbumin), member 4; NULL     |
| DENND6A                                        | -3.08 | DENN/MADD domain containing 6A; NULL                                |
| UBR2                                           | -3.09 | ubiquitin protein ligase E3 component n-recognin 2; NULL            |
| DOCK5                                          | -3.09 | dedicator of cytokinesis 5; NULL                                    |
| NPC1                                           | -3.12 | Niemann-Pick disease, type C1; NULL                                 |
| HEATR5A                                        | -3.13 | HEAT repeat containing 5A                                           |
| PRIM1                                          | -3.15 | primase, DNA, polypeptide 1 (49kDa)                                 |
| SPTLC3                                         | -3.16 | serine palmitoyltransferase, long chain base subunit 3; NULL        |
| C8orf22                                        | -3.18 | chromosome 8 open reading frame 22; NULL                            |
| TRMT1L                                         | -3.19 | tRNA methyltransferase 1 homolog (S. cerevisiae)-like; NULL         |
| RHOQ                                           | -3.19 | ras homolog family member Q; NULL                                   |
| DHX32                                          | -3.21 | DEAH (Asp-Glu-Ala-His) box polypeptide 32; NULL                     |

|                                 |       |                                                                                      |
|---------------------------------|-------|--------------------------------------------------------------------------------------|
| CTR9                            | -3.22 | Ctr9, Paf1/RNA polymerase II complex component, homolog ( <i>S. cerevisiae</i> )     |
| MYO1C                           | -3.22 | myosin IC; NULL                                                                      |
| DNAJC13                         | -3.23 | DnaJ (Hsp40) homolog, subfamily C, member 13; NULL                                   |
| LXN                             | -3.23 | latexin; NULL                                                                        |
| ZNF252P                         | -3.24 | zinc finger protein 252, pseudogene                                                  |
| UBA6                            | -3.26 | ubiquitin-like modifier activating enzyme 6;                                         |
| MKNK2                           | -3.32 | MAP kinase interacting serine/threonine kinase                                       |
| IDH1                            | -3.33 | isocitrate dehydrogenase 1 (NADP+), soluble; NULL                                    |
| SERPINB3                        | -3.36 | serpin peptidase inhibitor, clade B (ovalbumin), member 3; NULL                      |
| CTH                             | -3.39 | cystathionase (cystathionine gamma-lyase);                                           |
| TRMT61B                         | -3.39 | tRNA methyltransferase 61 homolog B ( <i>S. cerevisiae</i> ); NULL                   |
| TLR6                            | -3.4  | toll-like receptor 6; NULL                                                           |
| KIAA0825                        | -3.4  | KIAA0825; NULL                                                                       |
| C15orf65                        | -3.43 | chromosome 15 open reading frame 65                                                  |
| XAB2                            | -3.43 | XPA binding protein 2                                                                |
| POLR2A                          | -3.55 | polymerase (RNA) II (DNA directed) polypeptide A, 220kDa                             |
| CENPE                           | -3.56 | centromere protein E, 312kDa; NULL                                                   |
| BRWD3                           | -3.58 | bromodomain and WD repeat domain containing 3; NULL                                  |
| KIAA1033                        | -3.59 | KIAA1033                                                                             |
| OTTHUMG00000015949; RP1-276N6.2 | -3.61 | NULL                                                                                 |
| MAPK4                           | -3.67 | mitogen-activated protein kinase 4                                                   |
| PPME1                           | -3.68 | protein phosphatase methylesterase 1                                                 |
| POP1                            | -3.75 | processing of precursor 1, ribonuclease P/MRP subunit ( <i>S. cerevisiae</i> ); NULL |
| SERPINB5                        | -3.78 | serpin peptidase inhibitor, clade B (ovalbumin), member 5; NULL                      |
| ROCK2                           | -3.82 | Rho-associated, coiled-coil containing protein kinase 2; NULL                        |
| MCF2                            | -3.99 | MCF.2 cell line derived transforming sequence; NULL                                  |
| TLCD1                           | -4.01 | TLC domain containing 1; NULL                                                        |
| DNAJC12                         | -4.02 | DnaJ (Hsp40) homolog, subfamily C, member 12; NULL                                   |
| STEAP4                          | -4.07 | STEAP family member 4; NULL                                                          |
| PALMD; MIR548AA1                | -4.15 | palmdelphin; microRNA 548aa-1; NULL                                                  |

|                                   |                                                                       |
|-----------------------------------|-----------------------------------------------------------------------|
| OTTHUMG00000074333;<br>AJ006998.2 | -4.15 NULL                                                            |
| LOC100506498                      | -4.99 uncharacterized LOC100506498                                    |
| EPGN                              | -5.87 epithelial mitogen homolog (mouse); epithelial<br>mitogen; NULL |
| RAB31                             | -6 RAB31, member RAS oncogene family                                  |
| PRG4                              | -9.03 proteoglycan 4; NULL                                            |

---
