# Supplementary material for: XAB2 functions in mitotic cell cycle progression via transcriptional regulation of CENPE
Source: PubMed Central journal article supplement (PMC5133980; doi:10.1038/cddis.2016.313), 2016-10-13
Supplement: cddis2016313x5.pdf [file cddis2016313x5.pdf]

**Table S2 Primers for cloning in this study**

| <b>Cloning primer</b>         | <b>Sequence(5'-3')</b>                      |
|-------------------------------|---------------------------------------------|
| CENPE-p(-1263~92)-F           | GATTGCTTGAGCCTAGGAGTTC                      |
| CENPE-p(-1263~92)-R           | ATCCTATCAGGCTGAACTGGTC                      |
| CENPE-p(-1263~92)-KF          | TATGGTACCGATTGCTTGAGCCTAGGAGTTC             |
| CENPE-p(-1263~92)-HR          | GAGAAGCTTATCCTATCAGGCTGAACTGGTC             |
| CENPE-p(-808~92)-KF           | TGAGGTACCAGGACTTTGAGACCAGCCTT               |
| CENPE-p(-408~92)-KF           | TATGGTACCTGGACTGGACAGCGAATTTC               |
| CENPE-p(-208~92)-KF           | TATGGTACCGTATTCCAGGACCACCACTC               |
| CENPE-p(-58~92)-KF            | TAAGGTACCGAATGGCCCATGACGTCACG               |
| CENPE-p(-1263~-209)-<br>HR    | GCGAAGCTTCAGAATACTATTATCTGCCA               |
| CENPE-p(-1263~-59)-<br>HR     | ATTAAGCTTCACGTGCGGAGCAGCGCGGG               |
| CENPE-p(-408~-209)-<br>ChIP-F | GACTGGACAGCGAATTTCAA                        |
| CENPE-p(-408~-209)-<br>ChIP-R | AGCTAGCGAACGTCATCCTC                        |
| CENPE-p(-208~-59)-<br>ChIP-F  | TTCCAGGACCACCACTCTCT                        |
| CENPE-p(-208~-59)-<br>ChIP-R  | GTGACGTCATGGGCCATTC                         |
| XAB2-HindIII-F                | TATAAGCTTGTGGTGATGGCGCGACTCTCGCGGCCCGA      |
| XAB2-XbaI-R                   | AGGTCTAGATCAGTCTTCCTTCAGGCTCCCAAACACTGCGGCT |
| CENPE-RT-F                    | CCTTAACCTTGTGGAGGTGGC                       |
| CENPE-RT-R                    | AGCGAACTGGATGAGGTGAT                        |
| CKAP5-RT-F                    | GAGAAAAGAGGCCCTGGAGT                        |
| CKAP5-RT-R                    | CCAACATGACATTGGTGTC                         |
| CLIP1-RT-F                    | CTCTTCCCTCAGCTCCATGA                        |
| CLIP1-RT-R                    | ATGTGCTGCTGCTTCTCCTT                        |
| CDC27-RT-F                    | GTTCCCAAAGAATCCCTCGT                        |
| CDC27-RT-R                    | GTGTGTCATCCGCATCTGTC                        |
| MAD2L1-RT-F                   | TGGCCGAGTTCTTCTCATTC                        |
| MAD2L1-RT-R                   | TGGCAGAAATGTCACCGTAG                        |
| GAPDH-RT-F                    | CTGAGTACGTCGTGGAGTCC                        |
| GAPDH-RT-R                    | AGGCAGGGATGATGTTCTGG                        |
